# Supplementary material for: Mechanosensilla in the adult abdomen ofDrosophila:engrailedandslithelp to corral the peripheral sensory axons into segmental bundles
Source: Oxford University Press journal article supplement (doi:10.1242/dev.044552), 2010-07-29
Supplement: dev044552tables1.pdf [file dev044552tables1.pdf]

**Table S1. Candidates for molecules involved in axon guidance in the *Drosophila* adult abdomen**

| Gene                                                | Expression patterns and phenotype                                                                                                                                                                                                                                                                                                                                                                                                                                                                                                                        |
|-----------------------------------------------------|----------------------------------------------------------------------------------------------------------------------------------------------------------------------------------------------------------------------------------------------------------------------------------------------------------------------------------------------------------------------------------------------------------------------------------------------------------------------------------------------------------------------------------------------------------|
| <i>Fasciclin 1 (Fas1)</i>                           | Homophilic cell adhesion molecule expressed in the fly embryonic central and peripheral nervous system (Elkins et al., 1990; McAllister et al., 1992). No expression was found by immunostaining using anti-Fas1 antibody.                                                                                                                                                                                                                                                                                                                               |
| <i>Fasciclin 2 (Fas2)</i>                           | A cell adhesion molecule involved in axon pathway finding and in bundling in both vertebrates and invertebrates (Grenningloh et al., 1991; Kristiansen and Hortsch, 2008). Expression was found in the extracellular membrane of mechanosensory neurons, and in abdominal peripheral nerves (Fig. S5A). <i>Fas2<sup>eb112</sup></i> mutant epidermal clones are normal except for some axonal misrouting and an abnormal spacing of bristles (Fig. S6) reminiscent of the phenotype of <i>Egfr<sup>-</sup></i> (Diaz-Benjumea and Garcia-Bellido, 1990). |
| <i>Fasciclin 3 (Fas3)</i>                           | In fly embryos, Fas3 is found in intercellular junctions and lateral cell membranes (Snow et al., 1989). <i>Fas3</i> is expressed in axons (Patel et al., 1987) and acts in axon pathfinding and synaptic target recognition (Chiba et al., 1995; Kose et al., 1997; Rose and Chiba, 1999). Antibody recognises the extracellular membranes of all A and P epidermal cells, in particular intercellular junctions more strongly (Fig. S5B). <i>Fas3<sup>-</sup></i> clones were normal.                                                                  |
| <i>slit (sli)</i>                                   | It is expressed in a subset of P cells (see main text and Fig. 5).                                                                                                                                                                                                                                                                                                                                                                                                                                                                                       |
| <i>Sema-1a</i>                                      | It acts in neuronal guidance both in vertebrates and invertebrates (Ayoob et al., 2006; Bagnard et al., 1998; Chen et al., 1998). An enhancer-trap line showed no expression. No defects were observed on neurons when <i>Sema-1a<sup>k13702</sup></i> epidermal clones were made.                                                                                                                                                                                                                                                                       |
| <i>Sema-2a</i>                                      | It acts in the axon guidance of invertebrates (Ayoob et al., 2006; Roy et al., 2000). No expression was found by immunostaining using anti-Sema-2a antibody.                                                                                                                                                                                                                                                                                                                                                                                             |
| <i>Down syndrome cell adhesion molecule (Dscam)</i> | It can act in axonal and dendritic wiring (Matthews et al., 2007; Shi et al., 2007; Zhan et al., 2004). An enhancer-trap line showed expression in the socket cell of each bristle (Fig. S5D). When <i>Dscam</i> is expressed with the <i>sca.Gal4</i> driver, all anterior dendrites formed a U-shape. However, the U-shape in 45% of the dendrites was abnormally long and turned away from the midline (instead of towards it, as in the wild type); segment 3 of five pupae were quantified (Fig. S7).                                               |
| <i>shotgun (shg)</i>                                | The fly E-cadherin orthologue, it modulates cell adhesion in epithelia (Dumstrei et al., 2002; Tepass et al., 1996) but <i>shg<sup>-</sup></i> epidermal clones induced no defects in neurons.                                                                                                                                                                                                                                                                                                                                                           |
| <i>18 wheeler (18w)</i>                             | It may act in cell-cell interactions (Chiang and Beachy, 1994) and is expressed in the embryonic CNS (Eldon et al., 1994). An enhancer-trap line showed expression in epidermal cells of A compartments (Fig. S5C).                                                                                                                                                                                                                                                                                                                                      |

- Ayoob, J. C., Terman, J. R. and Kolodkin, A. L. (2006). *Drosophila* Plexin B is a Sema-2a receptor required for axon guidance. *Development* **133**, 2125-2135.
- Bagnard, D., Lohrum, M., Uziel, D., Puschel, A. W. and Bolz, J. (1998). Semaphorins act as attractive and repulsive guidance signals during the development of cortical projections. *Development* **125**, 5043-5053.
- Chen, H., He, Z., Bagri, A. and Tessier-Lavigne, M. (1998). Semaphorin-neuropilin interactions underlying sympathetic axon responses to class III semaphorins. *Neuron* **21**, 1283-1290.
- Chiang, C. and Beachy, P. A. (1994). Expression of a novel Toll-like gene spans the parasegment boundary and contributes to hedgehog function in the adult eye of *Drosophila*. *Mech. Dev.* **47**, 225-239.
- Chiba, A., Snow, P., Keshishian, H. and Hotta, Y. (1995). Fasciclin III as a synaptic target recognition molecule in *Drosophila*. *Nature* **374**, 166-168.
- Diaz-Benjumea, F. J. and Garcia-Bellido, A. (1990). Behaviour of cells mutant for an EGF receptor homologue of *Drosophila* in genetic mosaics. *Proc. Biol. Sci.* **242**, 36-44.
- Dumstrei, K., Wang, F., Shy, D., Tepass, U. and Hartenstein, V. (2002). Interaction between EGFR signaling and DE-cadherin during nervous system morphogenesis. *Development* **129**, 3983-3994.
- Eldon, E., Kooyer, S., D'Evelyn, D., Duman, M., Lawinger, P., Botas, J. and Bellen, H. (1994). The *Drosophila* 18 wheeler is required for morphogenesis and has striking similarities to Toll. *Development* **120**, 885-899.
- Elkins, T., Hortsch, M., Bieber, A. J., Snow, P. M. and Goodman, C. S. (1990). *Drosophila* fasciclin I is a novel homophilic adhesion molecule that along with fasciclin III can mediate cell sorting. *J. Cell Biol.* **110**, 1825-1832.
- Grenningloh, G., Rehm, E. J. and Goodman, C. S. (1991). Genetic analysis of growth cone guidance in *Drosophila*: fasciclin II functions as a neuronal recognition molecule. *Cell* **67**, 45-57.
- Kose, H., Rose, D., Zhu, X. and Chiba, A. (1997). Homophilic synaptic target recognition mediated by immunoglobulin-like cell adhesion molecule Fasciclin III. *Development* **124**, 4143-4152.
- Kristiansen, L. V. and Hortsch, M. (2008). Fasciclin II: The NCAM Ortholog in *Drosophila melanogaster*. *Neurochem. Res.*
- Matthews, B. J., Kim, M. E., Flanagan, J. J., Hattori, D., Clemens, J. C., Zipursky, S. L. and Grueber, W. B. (2007). Dendrite self-avoidance is controlled by Dscam. *Cell* **129**, 593-604.
- McAllister, L., Goodman, C. S. and Zinn, K. (1992). Dynamic expression of the cell adhesion molecule fasciclin I during embryonic development in *Drosophila*. *Development* **115**, 267-276.
- Patel, N. H., Snow, P. M. and Goodman, C. S. (1987). Characterization and cloning of fasciclin III: a glycoprotein expressed on a subset of neurons and axon pathways in *Drosophila*. *Cell* **48**, 975-988.
- Rose, D. and Chiba, A. (1999). A single growth cone is capable of integrating simultaneously presented and functionally distinct molecular cues during target recognition. *J. Neurosci.* **19**, 4899-4906.
- Roy, P. J., Zheng, H., Warren, C. E. and Culotti, J. G. (2000). mab-20 encodes Semaphorin-2a and is required to prevent ectopic cell contacts during epidermal morphogenesis in *Caenorhabditis elegans*. *Development* **127**, 755-767.
- Shi, L., Yu, H. H., Yang, J. S. and Lee, T. (2007). Specific *Drosophila* Dscam juxtamembrane variants control dendritic elaboration and axonal arborization. *J. Neurosci.* **27**, 6723-6728.
- Snow, P. M., Bieber, A. J. and Goodman, C. S. (1989). Fasciclin III: a novel homophilic adhesion molecule in *Drosophila*. *Cell* **59**, 313-323.
- Tepass, U., Gruszynski-DeFeo, E., Haag, T. A., Omatyar, L., Torok, T. and Hartenstein, V. (1996). shotgun encodes *Drosophila* E-cadherin and is preferentially required during cell rearrangement in the neuroectoderm and other morphogenetically active epithelia. *Genes Dev.* **10**, 672-685.
- Zhan, X. L., Clemens, J. C., Neves, G., Hattori, D., Flanagan, J. J., Hummel, T., Vasconcelos, M. L., Chess, A. and Zipursky, S. L. (2004). Analysis of Dscam diversity in regulating axon guidance in *Drosophila* mushroom bodies. *Neuron* **43**, 673-686.
